# Supplementary material
Source: publisher figshare collection journal article supplement (https://acs.figshare.com/ndownloader/files/3780784)
Supplement: Supplementary file 1 [file 3780784]

data_1
_audit_creation_date              2015-03-16
_audit_creation_method
;
  Olex2 1.2-ac2
  (compiled 2012.03.06 svn.r2239, GUI svn.r4109)
;
_publ_contact_author_address      ?
_publ_contact_author_email        ?
_publ_contact_author_name         ''
_publ_contact_author_phone        ?
_chemical_name_common             ?
_chemical_name_systematic
;
 ? 
;
_chemical_formula_moiety          'C15 H22 N2 O3'
_chemical_formula_sum             'C15 H22 N2 O3'
_chemical_formula_weight          278.35
_chemical_absolute_configuration  ad
_chemical_melting_point           ?
loop_
  _atom_type_symbol
  _atom_type_description
  _atom_type_scat_dispersion_real
  _atom_type_scat_dispersion_imag
  _atom_type_scat_source
 'C' 'C' 0.0181 0.0091 'International Tables Vol C Tables 4.2.6.8 and 6.1.1.4'
 'H' 'H' 0.0000 0.0000 'International Tables Vol C Tables 4.2.6.8 and 6.1.1.4'
 'N' 'N' 0.0311 0.0180 'International Tables Vol C Tables 4.2.6.8 and 6.1.1.4'
 'O' 'O' 0.0492 0.0322 'International Tables Vol C Tables 4.2.6.8 and 6.1.1.4'

_space_group_crystal_system       'orthorhombic'
_space_group_IT_number            19
_space_group_name_H-M_alt         'P 21 21 21'
_space_group_name_Hall            'P 2ac 2ab'
loop_
  _space_group_symop_id
  _space_group_symop_operation_xyz
 1 'x, y, z'
 2 '-x+1/2, -y, z+1/2'
 3 'x+1/2, -y+1/2, -z'
 4 '-x, y+1/2, -z+1/2'

_cell_length_a                    9.052(3)
_cell_length_b                    10.577(3)
_cell_length_c                    14.128(4)
_cell_angle_alpha                 90.00
_cell_angle_beta                  90.00
_cell_angle_gamma                 90.00
_cell_volume                      1352.6(7)
_cell_formula_units_Z             4
_cell_measurement_reflns_used     8803
_cell_measurement_temperature     296.15
_cell_measurement_theta_max       65.96
_cell_measurement_theta_min       5.81
_exptl_absorpt_coefficient_mu     0.775
_exptl_absorpt_correction_T_max   0.9406
_exptl_absorpt_correction_T_min   0.8008
_exptl_absorpt_correction_type    'none'
_exptl_absorpt_process_details    ?
_exptl_crystal_colour             colourless
_exptl_crystal_density_diffrn     1.367
_exptl_crystal_density_meas       .
_exptl_crystal_density_method     'not measured'
_exptl_crystal_description        needle
_exptl_crystal_F_000              600
_exptl_crystal_size_max           0.30
_exptl_crystal_size_mid           0.15
_exptl_crystal_size_min           0.08
_exptl_special_details
;
 ? 
;
_diffrn_reflns_av_R_equivalents   0.0418
_diffrn_reflns_av_unetI/netI      0.0215
_diffrn_reflns_limit_h_max        10
_diffrn_reflns_limit_h_min        -10
_diffrn_reflns_limit_k_max        12
_diffrn_reflns_limit_k_min        -9
_diffrn_reflns_limit_l_max        16
_diffrn_reflns_limit_l_min        -16
_diffrn_reflns_number             12359
_diffrn_reflns_theta_full         66.34
_diffrn_reflns_theta_max          66.34
_diffrn_reflns_theta_min          5.22
_diffrn_ambient_temperature       296.15
_diffrn_detector_area_resol_mean  ?
_diffrn_measured_fraction_theta_full 0.972
_diffrn_measured_fraction_theta_max 0.972
_diffrn_measurement_device_type   'Bruker APEX-II CCD'
_diffrn_measurement_method        '\f and \w scans'
_diffrn_radiation_monochromator   'graphite'
_diffrn_radiation_type            'CuK\a'
_diffrn_radiation_wavelength      1.54184
_diffrn_source                    'fine-focus sealed tube'
_diffrn_source_current            0.64
_diffrn_source_power              0.0286272
_diffrn_source_voltage            44.73
_diffrn_standards_decay_%         ?
_diffrn_standards_interval_count  ?
_diffrn_standards_interval_time   ?
_diffrn_standards_number          0
_reflns_number_gt                 2205
_reflns_number_total              2264
_reflns_threshold_expression      >2sigma(I)
_computing_cell_refinement        ?
_computing_data_collection        ?
_computing_data_reduction         ?
_computing_molecular_graphics
;
O. V. Dolomanov, L. J. Bourhis, R. J. Gildea, J. A. K. Howard and H. Puschmann,
OLEX2: a complete structure solution, refinement and analysis program.
J. Appl. Cryst. (2009). 42, 339-341.
;
_computing_publication_material
;
O. V. Dolomanov, L. J. Bourhis, R. J. Gildea, J. A. K. Howard and H. Puschmann,
OLEX2: a complete structure solution, refinement and analysis program.
J. Appl. Cryst. (2009). 42, 339-341.
;
_computing_structure_refinement
;
XL, G.M. Sheldrick, Acta Cryst.
(2008). A64, 112-122
;
_computing_structure_solution
;
XS, G.M. Sheldrick, Acta Cryst.
(2008). A64, 112-122
;
_refine_diff_density_max          0.129
_refine_diff_density_min          -0.218
_refine_diff_density_rms          0.057
_refine_ls_abs_structure_details  'Flack H D (1983), Acta Cryst. A39, 876-881'
_refine_ls_abs_structure_Flack    0.13(19)
_refine_ls_extinction_coef        ?
_refine_ls_extinction_method      none
_refine_ls_goodness_of_fit_ref    1.125
_refine_ls_hydrogen_treatment     mixed
_refine_ls_matrix_type            full
_refine_ls_number_parameters      182
_refine_ls_number_reflns          2264
_refine_ls_number_restraints      0
_refine_ls_R_factor_all           0.0308
_refine_ls_R_factor_gt            0.0301
_refine_ls_restrained_S_all       1.125
_refine_ls_shift/su_max           0.000
_refine_ls_shift/su_mean          0.000
_refine_ls_structure_factor_coef  Fsqd
_refine_ls_weighting_details
'calc w=1/[\s^2^(Fo^2^)+(0.0448P)^2^+0.1273P] where P=(Fo^2^+2Fc^2^)/3'
_refine_ls_weighting_scheme       calc
_refine_ls_wR_factor_gt           0.0763
_refine_ls_wR_factor_ref          0.0771
_refine_special_details
;
 Refinement of F^2^ against ALL reflections.  The weighted R-factor wR and 
 goodness of fit S are based on F^2^, conventional R-factors R are based 
 on F, with F set to zero for negative F^2^. The threshold expression of 
 F^2^ > 2sigma(F^2^) is used only for calculating R-factors(gt) etc. and is 
 not relevant to the choice of reflections for refinement.  R-factors based 
 on F^2^ are statistically about twice as large as those based on F, and R- 
 factors based on ALL data will be even larger. 
;
_atom_sites_solution_hydrogens    geom
_atom_sites_solution_primary      direct
_atom_sites_solution_secondary    difmap
loop_
  _atom_site_label
  _atom_site_type_symbol
  _atom_site_fract_x
  _atom_site_fract_y
  _atom_site_fract_z
  _atom_site_U_iso_or_equiv
  _atom_site_adp_type
  _atom_site_occupancy
  _atom_site_symmetry_multiplicity
  _atom_site_calc_flag
  _atom_site_refinement_flags
  _atom_site_disorder_assembly
  _atom_site_disorder_group
 O1 O 0.06693(10) 0.98908(7) 0.74339(7) 0.0321(2) Uani 1 1 d . . .
 O2 O -0.19517(11) 0.67815(9) 0.85080(7) 0.0359(2) Uani 1 1 d . . .
 H2 H -0.1606 0.6155 0.8248 0.054 Uiso 1 1 calc R . .
 O3 O -0.40572(15) 1.05933(14) 0.87513(10) 0.0655(4) Uani 1 1 d . . .
 N1 N 0.11077(12) 0.86319(10) 0.73697(8) 0.0296(3) Uani 1 1 d . . .
 N2 N -0.27811(13) 0.92985(11) 0.77737(8) 0.0316(3) Uani 1 1 d . . .
 C2 C 0.22114(17) 0.83691(16) 0.81349(11) 0.0422(4) Uani 1 1 d . . .
 H2A H 0.2565 0.7507 0.8075 0.051 Uiso 1 1 calc R . .
 H2B H 0.3050 0.8932 0.8062 0.051 Uiso 1 1 calc R . .
 C3 C 0.15470(18) 0.85501(15) 0.90957(11) 0.0428(4) Uani 1 1 d . . .
 H3A H 0.1234 0.9422 0.9168 0.051 Uiso 1 1 calc R . .
 H3B H 0.2282 0.8372 0.9577 0.051 Uiso 1 1 calc R . .
 C4 C 0.02275(18) 0.76758(14) 0.92276(10) 0.0395(4) Uani 1 1 d . . .
 H4A H -0.0235 0.7861 0.9831 0.047 Uiso 1 1 calc R . .
 H4B H 0.0575 0.6809 0.9248 0.047 Uiso 1 1 calc R . .
 C5 C -0.09226(15) 0.77995(12) 0.84469(9) 0.0287(3) Uani 1 1 d . . .
 C6 C -0.01938(14) 0.77336(11) 0.74689(9) 0.0276(3) Uani 1 1 d . . .
 H6 H 0.0201 0.6876 0.7401 0.033 Uiso 1 1 calc R . .
 C7 C -0.13281(14) 0.79075(13) 0.66885(9) 0.0302(3) Uani 1 1 d . . .
 H7 H -0.2013 0.7193 0.6738 0.036 Uiso 1 1 calc R . .
 C8 C -0.05788(18) 0.77933(15) 0.57206(10) 0.0405(3) Uani 1 1 d . . .
 H8A H -0.0273 0.6924 0.5623 0.049 Uiso 1 1 calc R . .
 H8B H -0.1286 0.8006 0.5230 0.049 Uiso 1 1 calc R . .
 C9 C 0.07578(17) 0.86524(14) 0.56319(10) 0.0410(4) Uani 1 1 d . . .
 H9A H 0.1243 0.8502 0.5030 0.049 Uiso 1 1 calc R . .
 H9B H 0.0442 0.9528 0.5648 0.049 Uiso 1 1 calc R . .
 C10 C 0.18287(16) 0.84102(14) 0.64265(11) 0.0393(4) Uani 1 1 d . . .
 H10A H 0.2178 0.7545 0.6392 0.047 Uiso 1 1 calc R . .
 H10B H 0.2675 0.8966 0.6361 0.047 Uiso 1 1 calc R . .
 C11 C -0.22657(15) 0.91120(13) 0.67885(9) 0.0308(3) Uani 1 1 d . . .
 H11 H -0.1663 0.9841 0.6604 0.037 Uiso 1 1 calc R . .
 C12 C -0.36037(18) 0.90416(17) 0.61389(12) 0.0479(4) Uani 1 1 d . . .
 H12A H -0.3278 0.9075 0.5485 0.057 Uiso 1 1 calc R . .
 H12B H -0.4105 0.8241 0.6235 0.057 Uiso 1 1 calc R . .
 C13 C -0.46527(16) 1.00911(16) 0.63183(14) 0.0507(4) Uani 1 1 d . . .
 H13 H -0.5262 1.0373 0.5832 0.061 Uiso 1 1 calc R . .
 C14 C -0.47332(17) 1.06267(15) 0.71525(14) 0.0510(4) Uani 1 1 d . . .
 H14 H -0.5373 1.1305 0.7241 0.061 Uiso 1 1 calc R . .
 C15 C -0.38337(16) 1.01793(15) 0.79539(12) 0.0416(4) Uani 1 1 d . . .
 C17 C -0.18131(16) 0.90020(13) 0.85733(9) 0.0315(3) Uani 1 1 d . . .
 H17A H -0.2411 0.8923 0.9140 0.038 Uiso 1 1 calc R . .
 H17B H -0.1137 0.9702 0.8669 0.038 Uiso 1 1 calc R . .

loop_
  _atom_site_aniso_label
  _atom_site_aniso_U_11
  _atom_site_aniso_U_22
  _atom_site_aniso_U_33
  _atom_site_aniso_U_23
  _atom_site_aniso_U_13
  _atom_site_aniso_U_12
 O1 0.0382(5) 0.0179(4) 0.0401(5) -0.0009(4) 0.0017(4) 0.0012(4)
 O2 0.0425(6) 0.0268(5) 0.0385(5) -0.0016(4) 0.0101(4) -0.0076(4)
 O3 0.0606(8) 0.0686(8) 0.0673(8) -0.0230(7) 0.0110(6) 0.0237(7)
 N1 0.0299(5) 0.0224(5) 0.0366(6) -0.0002(5) 0.0027(5) 0.0022(4)
 N2 0.0313(5) 0.0307(6) 0.0327(6) -0.0032(5) 0.0024(5) 0.0025(5)
 C2 0.0325(7) 0.0382(8) 0.0558(10) 0.0056(7) -0.0073(7) 0.0028(6)
 C3 0.0447(8) 0.0414(9) 0.0425(8) 0.0037(7) -0.0163(7) -0.0009(7)
 C4 0.0515(9) 0.0352(8) 0.0318(7) 0.0048(6) -0.0054(7) 0.0020(7)
 C5 0.0350(7) 0.0236(6) 0.0273(7) 0.0003(5) 0.0026(6) -0.0043(5)
 C6 0.0324(7) 0.0182(6) 0.0322(7) -0.0016(5) 0.0035(6) -0.0003(5)
 C7 0.0363(7) 0.0278(7) 0.0266(6) -0.0048(5) 0.0028(6) -0.0062(6)
 C8 0.0528(8) 0.0401(8) 0.0286(7) -0.0087(6) 0.0072(7) -0.0049(7)
 C9 0.0544(9) 0.0360(8) 0.0327(7) -0.0029(6) 0.0163(7) -0.0031(7)
 C10 0.0377(8) 0.0332(7) 0.0469(8) -0.0025(6) 0.0160(7) 0.0002(6)
 C11 0.0327(7) 0.0323(7) 0.0275(7) 0.0009(5) -0.0013(6) -0.0028(6)
 C12 0.0462(9) 0.0555(10) 0.0420(8) 0.0039(7) -0.0141(7) -0.0057(8)
 C13 0.0351(8) 0.0481(9) 0.0689(11) 0.0189(9) -0.0158(7) -0.0066(8)
 C14 0.0300(8) 0.0384(8) 0.0847(13) 0.0085(9) -0.0043(8) 0.0038(6)
 C15 0.0333(7) 0.0346(8) 0.0571(9) -0.0062(7) 0.0058(7) 0.0001(6)
 C17 0.0392(7) 0.0292(7) 0.0261(7) -0.0045(5) 0.0022(6) -0.0001(6)

_geom_special_details
;
 All esds (except the esd in the dihedral angle between two l.s. planes) 
 are estimated using the full covariance matrix.  The cell esds are taken 
 into account individually in the estimation of esds in distances, angles 
 and torsion angles; correlations between esds in cell parameters are only 
 used when they are defined by crystal symmetry.  An approximate (isotropic) 
 treatment of cell esds is used for estimating esds involving l.s. planes. 
;
loop_
  _geom_bond_atom_site_label_1
  _geom_bond_atom_site_label_2
  _geom_bond_distance
  _geom_bond_site_symmetry_2
  _geom_bond_publ_flag
 O1 N1 1.3923(14) . ?
 O2 H2 0.8200 . ?
 O2 C5 1.4264(16) . ?
 O3 C15 1.226(2) . ?
 N1 C2 1.4980(18) . ?
 N1 C6 1.5200(16) . ?
 N1 C10 1.5022(18) . ?
 N2 C11 1.4811(17) . ?
 N2 C15 1.357(2) . ?
 N2 C17 1.4637(18) . ?
 C2 H2A 0.9700 . ?
 C2 H2B 0.9700 . ?
 C2 C3 1.497(2) . ?
 C3 H3A 0.9700 . ?
 C3 H3B 0.9700 . ?
 C3 C4 1.522(2) . ?
 C4 H4A 0.9700 . ?
 C4 H4B 0.9700 . ?
 C4 C5 1.5224(19) . ?
 C5 C6 1.5326(18) . ?
 C5 C17 1.5163(18) . ?
 C6 H6 0.9800 . ?
 C6 C7 1.5179(19) . ?
 C7 H7 0.9800 . ?
 C7 C8 1.5312(19) . ?
 C7 C11 1.5373(19) . ?
 C8 H8A 0.9700 . ?
 C8 H8B 0.9700 . ?
 C8 C9 1.518(2) . ?
 C9 H9A 0.9700 . ?
 C9 H9B 0.9700 . ?
 C9 C10 1.505(2) . ?
 C10 H10A 0.9700 . ?
 C10 H10B 0.9700 . ?
 C11 H11 0.9800 . ?
 C11 C12 1.5215(19) . ?
 C12 H12A 0.9700 . ?
 C12 H12B 0.9700 . ?
 C12 C13 1.483(3) . ?
 C13 H13 0.9300 . ?
 C13 C14 1.310(3) . ?
 C14 H14 0.9300 . ?
 C14 C15 1.473(2) . ?
 C17 H17A 0.9700 . ?
 C17 H17B 0.9700 . ?

loop_
  _geom_angle_atom_site_label_1
  _geom_angle_atom_site_label_2
  _geom_angle_atom_site_label_3
  _geom_angle
  _geom_angle_site_symmetry_1
  _geom_angle_site_symmetry_3
  _geom_angle_publ_flag
 C5 O2 H2 109.5 . . ?
 O1 N1 C2 108.70(10) . . ?
 O1 N1 C6 111.77(9) . . ?
 O1 N1 C10 109.32(10) . . ?
 C2 N1 C6 109.54(10) . . ?
 C2 N1 C10 108.75(11) . . ?
 C10 N1 C6 108.72(10) . . ?
 C15 N2 C11 119.28(12) . . ?
 C15 N2 C17 115.01(11) . . ?
 C17 N2 C11 120.54(10) . . ?
 N1 C2 H2A 109.4 . . ?
 N1 C2 H2B 109.4 . . ?
 H2A C2 H2B 108.0 . . ?
 C3 C2 N1 111.26(12) . . ?
 C3 C2 H2A 109.4 . . ?
 C3 C2 H2B 109.4 . . ?
 C2 C3 H3A 109.6 . . ?
 C2 C3 H3B 109.6 . . ?
 C2 C3 C4 110.40(13) . . ?
 H3A C3 H3B 108.1 . . ?
 C4 C3 H3A 109.6 . . ?
 C4 C3 H3B 109.6 . . ?
 C3 C4 H4A 108.9 . . ?
 C3 C4 H4B 108.9 . . ?
 C3 C4 C5 113.32(11) . . ?
 H4A C4 H4B 107.7 . . ?
 C5 C4 H4A 108.9 . . ?
 C5 C4 H4B 108.9 . . ?
 O2 C5 C4 109.75(11) . . ?
 O2 C5 C6 107.54(10) . . ?
 O2 C5 C17 106.19(11) . . ?
 C4 C5 C6 110.79(11) . . ?
 C17 C5 C4 110.51(11) . . ?
 C17 C5 C6 111.91(10) . . ?
 N1 C6 C5 112.85(10) . . ?
 N1 C6 H6 106.7 . . ?
 C5 C6 H6 106.7 . . ?
 C7 C6 N1 112.43(10) . . ?
 C7 C6 C5 110.99(11) . . ?
 C7 C6 H6 106.7 . . ?
 C6 C7 H7 106.4 . . ?
 C6 C7 C8 109.85(11) . . ?
 C6 C7 C11 114.02(11) . . ?
 C8 C7 H7 106.4 . . ?
 C8 C7 C11 113.08(12) . . ?
 C11 C7 H7 106.4 . . ?
 C7 C8 H8A 109.1 . . ?
 C7 C8 H8B 109.1 . . ?
 H8A C8 H8B 107.9 . . ?
 C9 C8 C7 112.30(11) . . ?
 C9 C8 H8A 109.1 . . ?
 C9 C8 H8B 109.1 . . ?
 C8 C9 H9A 109.6 . . ?
 C8 C9 H9B 109.6 . . ?
 H9A C9 H9B 108.1 . . ?
 C10 C9 C8 110.48(12) . . ?
 C10 C9 H9A 109.6 . . ?
 C10 C9 H9B 109.6 . . ?
 N1 C10 C9 110.81(11) . . ?
 N1 C10 H10A 109.5 . . ?
 N1 C10 H10B 109.5 . . ?
 C9 C10 H10A 109.5 . . ?
 C9 C10 H10B 109.5 . . ?
 H10A C10 H10B 108.1 . . ?
 N2 C11 C7 111.76(11) . . ?
 N2 C11 H11 108.7 . . ?
 N2 C11 C12 108.82(12) . . ?
 C7 C11 H11 108.7 . . ?
 C12 C11 C7 110.09(12) . . ?
 C12 C11 H11 108.7 . . ?
 C11 C12 H12A 109.3 . . ?
 C11 C12 H12B 109.3 . . ?
 H12A C12 H12B 107.9 . . ?
 C13 C12 C11 111.72(13) . . ?
 C13 C12 H12A 109.3 . . ?
 C13 C12 H12B 109.3 . . ?
 C12 C13 H13 119.6 . . ?
 C14 C13 C12 120.89(14) . . ?
 C14 C13 H13 119.6 . . ?
 C13 C14 H14 119.3 . . ?
 C13 C14 C15 121.47(15) . . ?
 C15 C14 H14 119.3 . . ?
 O3 C15 N2 122.26(15) . . ?
 O3 C15 C14 120.04(15) . . ?
 N2 C15 C14 117.69(14) . . ?
 N2 C17 C5 114.02(11) . . ?
 N2 C17 H17A 108.7 . . ?
 N2 C17 H17B 108.7 . . ?
 C5 C17 H17A 108.7 . . ?
 C5 C17 H17B 108.7 . . ?
 H17A C17 H17B 107.6 . . ?

loop_
  _geom_torsion_atom_site_label_1
  _geom_torsion_atom_site_label_2
  _geom_torsion_atom_site_label_3
  _geom_torsion_atom_site_label_4
  _geom_torsion
  _geom_torsion_site_symmetry_1
  _geom_torsion_site_symmetry_2
  _geom_torsion_site_symmetry_3
  _geom_torsion_site_symmetry_4
  _geom_torsion_publ_flag
 O1 N1 C2 C3 62.17(15) . . . . ?
 O1 N1 C6 C5 -64.47(13) . . . . ?
 O1 N1 C6 C7 62.01(13) . . . . ?
 O1 N1 C10 C9 -61.92(14) . . . . ?
 O2 C5 C6 N1 -170.49(10) . . . . ?
 O2 C5 C6 C7 62.27(13) . . . . ?
 O2 C5 C17 N2 -70.28(13) . . . . ?
 N1 C2 C3 C4 59.09(17) . . . . ?
 N1 C6 C7 C8 54.42(14) . . . . ?
 N1 C6 C7 C11 -73.70(14) . . . . ?
 N2 C11 C12 C13 48.60(17) . . . . ?
 C2 N1 C6 C5 56.06(13) . . . . ?
 C2 N1 C6 C7 -177.46(11) . . . . ?
 C2 N1 C10 C9 179.54(12) . . . . ?
 C2 C3 C4 C5 -53.73(17) . . . . ?
 C3 C4 C5 O2 167.81(12) . . . . ?
 C3 C4 C5 C6 49.20(16) . . . . ?
 C3 C4 C5 C17 -75.41(15) . . . . ?
 C4 C5 C6 N1 -50.56(13) . . . . ?
 C4 C5 C6 C7 -177.80(11) . . . . ?
 C4 C5 C17 N2 170.76(11) . . . . ?
 C5 C6 C7 C8 -178.11(11) . . . . ?
 C5 C6 C7 C11 53.77(14) . . . . ?
 C6 N1 C2 C3 -60.21(15) . . . . ?
 C6 N1 C10 C9 60.34(14) . . . . ?
 C6 C5 C17 N2 46.79(15) . . . . ?
 C6 C7 C8 C9 -52.03(16) . . . . ?
 C6 C7 C11 N2 -44.57(15) . . . . ?
 C6 C7 C11 C12 -165.62(12) . . . . ?
 C7 C8 C9 C10 54.76(16) . . . . ?
 C7 C11 C12 C13 171.40(13) . . . . ?
 C8 C7 C11 N2 -171.02(11) . . . . ?
 C8 C7 C11 C12 67.93(15) . . . . ?
 C8 C9 C10 N1 -59.06(15) . . . . ?
 C10 N1 C2 C3 -178.90(12) . . . . ?
 C10 N1 C6 C5 174.77(10) . . . . ?
 C10 N1 C6 C7 -58.76(13) . . . . ?
 C11 N2 C15 O3 -162.23(15) . . . . ?
 C11 N2 C15 C14 18.4(2) . . . . ?
 C11 N2 C17 C5 -40.67(17) . . . . ?
 C11 C7 C8 C9 76.61(15) . . . . ?
 C11 C12 C13 C14 -27.1(2) . . . . ?
 C12 C13 C14 C15 -2.5(2) . . . . ?
 C13 C14 C15 O3 -171.20(17) . . . . ?
 C13 C14 C15 N2 8.2(2) . . . . ?
 C15 N2 C11 C7 -168.12(12) . . . . ?
 C15 N2 C11 C12 -46.33(17) . . . . ?
 C15 N2 C17 C5 164.94(12) . . . . ?
 C17 N2 C11 C7 38.56(16) . . . . ?
 C17 N2 C11 C12 160.34(12) . . . . ?
 C17 N2 C15 O3 -7.5(2) . . . . ?
 C17 N2 C15 C14 173.18(12) . . . . ?
 C17 C5 C6 N1 73.26(14) . . . . ?
 C17 C5 C6 C7 -53.98(13) . . . . ?
